# Supplementary material for: Assessment and Management of Dysphagia in Acute Stroke: An Initial Service Review of International Practice
Source: MDPI journal article supplement (doi:10.3390/geriatrics5010004), 2020-01-21
Supplement: s1 [file s1]

**Q1** Questionnaire Supplementary material for:

**Assessment and Management of Dysphagia in acute stroke: an initial service review of International Practice**

**Full questionnaire**

Profession:

Grade:

Client group:

Type of location e.g community/acute

Country:

*What bedside techniques do you use to ensure that patients with dysphagia, following stroke, swallow safely?*

|                                                                                          | yes/no | within<br>4/24/47/72<br>hrs | profession(s)<br>involved |                           |
|------------------------------------------------------------------------------------------|--------|-----------------------------|---------------------------|---------------------------|
| Nurse/other screening                                                                    |        |                             |                           |                           |
| 3oz water protocol                                                                       |        |                             |                           | If yes, specify protocol: |
| Timed test of swallowing                                                                 |        |                             |                           |                           |
| Cervical Auscultation                                                                    |        |                             |                           |                           |
| Dysphagia screening (other than nurse screening as above-please specify assessment used) |        |                             |                           |                           |

*What instrumental assessment tools do you use in the assessment of stroke patients in your practice?*

|                        | <i>Not at all<br/>rarely (1-10% of patients)<br/>frequently (11-50% of patients )<br/>in most patients (&gt;50%)</i> | <i>Within<br/>24 hours/48 hours/72<br/>hours/Within a week/more</i> |
|------------------------|----------------------------------------------------------------------------------------------------------------------|---------------------------------------------------------------------|
| Videoflouroscopy       |                                                                                                                      |                                                                     |
| FEES                   |                                                                                                                      |                                                                     |
| Other: please specify: |                                                                                                                      |                                                                     |

Do you have any comments regarding tests you would like to use but are unable to due to availability etc.....

*Which techniques do you use for swallow rehabilitation?*

|                                                       | What techniques do you use with dysphagic stroke patients in your practice? Indicate frequency below | What non-SALT staff involved in this | When would you begin these techniques: |
|-------------------------------------------------------|------------------------------------------------------------------------------------------------------|--------------------------------------|----------------------------------------|
|                                                       | <i>none</i>                                                                                          | <i>None</i>                          | <i>24 hours</i>                        |
|                                                       | <i>rarely (1-10% of patients)</i>                                                                    | <i>Nurses</i>                        | <i>48 hours</i>                        |
|                                                       | <i>frequently (11-50% of patients )</i>                                                              | <i>Relatives</i>                     | <i>72 hours</i>                        |
|                                                       | <i>in most patients (&gt;50%)</i>                                                                    | <i>Assistants</i>                    | <i>Within a week</i>                   |
|                                                       |                                                                                                      | <i>Other AHP</i>                     | <i>More</i>                            |
|                                                       |                                                                                                      | <i>Other (specify)</i>               |                                        |
| Modification of food texture                          |                                                                                                      |                                      |                                        |
| Modification of liquid thickness                      |                                                                                                      |                                      |                                        |
| Frazier Free Water Protocol                           |                                                                                                      |                                      |                                        |
| Use of sour bolus                                     |                                                                                                      |                                      |                                        |
| Use of carbonated bolus                               |                                                                                                      |                                      |                                        |
| Use of ice cool bolus                                 |                                                                                                      |                                      |                                        |
| Other (please specify):                               |                                                                                                      |                                      |                                        |
| Shaker Exercise                                       |                                                                                                      |                                      |                                        |
| Hyoid Lift Manoeuvre                                  |                                                                                                      |                                      |                                        |
| Mendelsohn Manoeuvre                                  |                                                                                                      |                                      |                                        |
| Effortful Swallow                                     |                                                                                                      |                                      |                                        |
| Supraglottic Swallow                                  |                                                                                                      |                                      |                                        |
| Super-Supraglottic Swallow                            |                                                                                                      |                                      |                                        |
| Head back                                             |                                                                                                      |                                      |                                        |
| Chin down/tuck                                        |                                                                                                      |                                      |                                        |
| Head rotation to weaker side                          |                                                                                                      |                                      |                                        |
| Head tilt to stronger side                            |                                                                                                      |                                      |                                        |
| Lying down on one side                                |                                                                                                      |                                      |                                        |
| <b><i>Jaw exercises</i></b>                           |                                                                                                      |                                      |                                        |
| <b><i>Tongue exercises</i></b>                        |                                                                                                      |                                      |                                        |
| Transcutaneous electrical stimulation (e.g Vitalstim) |                                                                                                      |                                      |                                        |
| Faucial stimulation                                   |                                                                                                      |                                      |                                        |
| <b>Other</b> (please specify):                        |                                                                                                      |                                      |                                        |

Do you have any comments regarding management techniques you would like to use but are unable to for various reasons?.....
